# Supplementary material for: Yolk–shell magnetic composite Fe3O4@Co/Zn-ZIF for MR imaging-guided chemotherapy of tumors in vivo
Source: Royal Society of Chemistry journal article supplement (doi:10.1039/d0nj05723a), 2021-01-01
Supplement: d0nj05723a1.pdf [file d0nj05723a1.pdf]

## Supplementary Material

### **Yolk-Shell Magnetic Composites $\text{Fe}_3\text{O}_4@\text{Co/Zn-ZIF}$ for MR Imaging-Guided Chemotherapy of Tumors in Vivo**

Ying Li, Lu-Lu Jiang, Ya-Xian Qiao, Dong wan and Yan-Feng Huang\*

*State Key Laboratory of Separation Membranes and Membrane Processes, and  
College of Chemistry and Chemical Engineering, Tiangong University, 399 West  
Binshui Road, Tianjin 300387, China.*

\*Corresponding author.

E-mail: [huangyanfeng@tiangong.edu.cn](mailto:huangyanfeng@tiangong.edu.cn) (Y.-F. Huang)

## Materials and Chemicals

Analytical grade zinc nitrate hexahydrate ( $\text{Zn}(\text{NO}_3)_2 \cdot 6\text{H}_2\text{O}$ ), cobalt nitrate hexahydrate ( $\text{Co}(\text{NO}_3)_2 \cdot 6\text{H}_2\text{O}$ ) and doxorubicin hydrochloride (DOX) were obtained from Shanghai Macklin Biochemical Co. Ltd. (Shanghai, China). Ferric chloride ( $\text{FeCl}_3 \cdot 6\text{H}_2\text{O}$ ), 2-Methylimidazole (99%), dopamine hydrochloride (DA, 98%), ethylene glycol and diethylene glycol were bought from Shanghai Aladdin Chemistry Co. Ltd. (Shanghai, China). Methanol, sodium acetate anhydrous ( $\text{NaOAc}$ ) and dimethyl sulfoxide were supplied by Tianjin fine Chemical R&D Center.

## Characterization

The shape and size of the samples were recorded on transmission electron microscope (TEM: Hitachi H7650) and scanning electron microscopy (SEM: Hitachi S4800). The elemental composition of the samples was measured using energy dispersive spectrometer. The sizes distribution and surface charge property of these crystals were measured by the Nano Size and Zeta-potential Tester (Zetasizer Nano ZSE Malvern, England). The X-ray diffraction (XRD) patterns were surveyed through a Rigaku Miniflex 600 X-ray diffractometer with  $\text{Cu}_{\text{K}\alpha}$  radiation source ( $\lambda=1.5418 \text{ \AA}$ ). The magnetization curves were taken in a vibrating sample magnetometer (VSM: LDJ-9600-1) at room temperature. The specific BET surface area and pore size of materials were carried out with an Autosorb-iQ gas sorption analyzer at 77 K. FT-IR spectra were conducted on a Nicolet IS50 FT-IR spectrometer. UV-vis spectra of

DOX were examined on a He $\lambda$ IOS- $\gamma$  spectrometer (Thermo Finnigan, USA). Thermogravimetric analysis (TGA) was determined by a STA449F3 thermal analyzer heating from room temperature to 900°C at 5 °C·min<sup>-1</sup>. The surface electronic states were investigated by an X-ray photoelectron spectroscopy (XPS: PerKin-Elmer PHI 5000C) at room temperature.

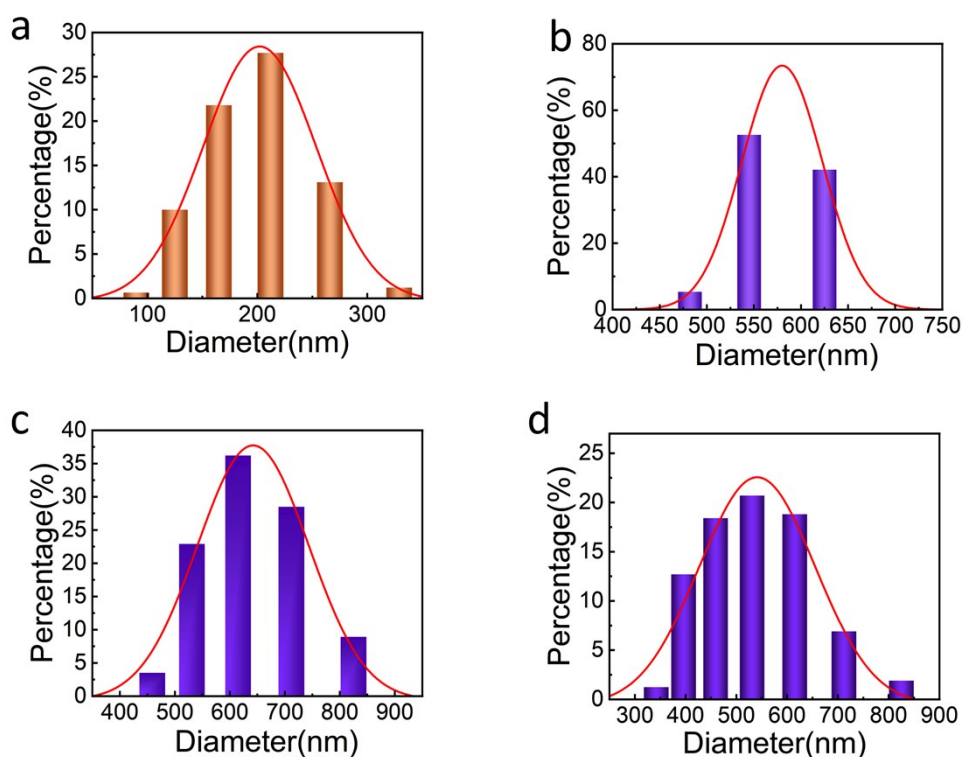

Fig.S1 Size distributions of Fe<sub>3</sub>O<sub>4</sub>-DA(a), ZIF-67@ZIF-8(b), Fe<sub>3</sub>O<sub>4</sub>@ZIF-67@ZIF-8(c), and Fe<sub>3</sub>O<sub>4</sub>@Co/Zn-ZIF(d) nanoparticles determined

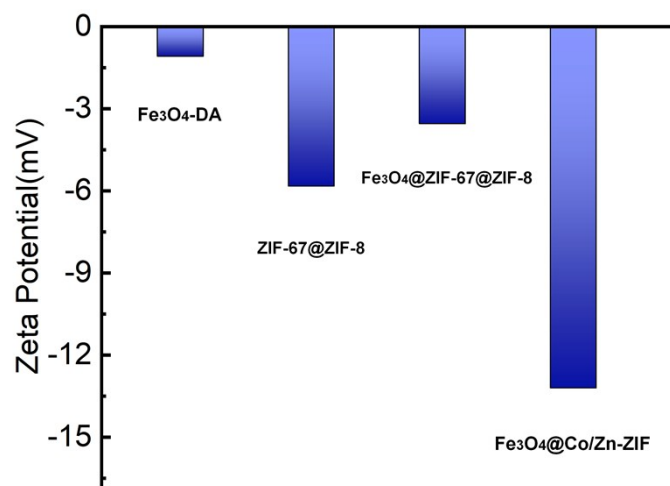

Fig.S2 Zeta potential values of Fe<sub>3</sub>O<sub>4</sub>-DA, ZIF-67@ZIF-8, Fe<sub>3</sub>O<sub>4</sub>@ZIF-67@ZIF-8, Fe<sub>3</sub>O<sub>4</sub>@Co/Zn-ZIF

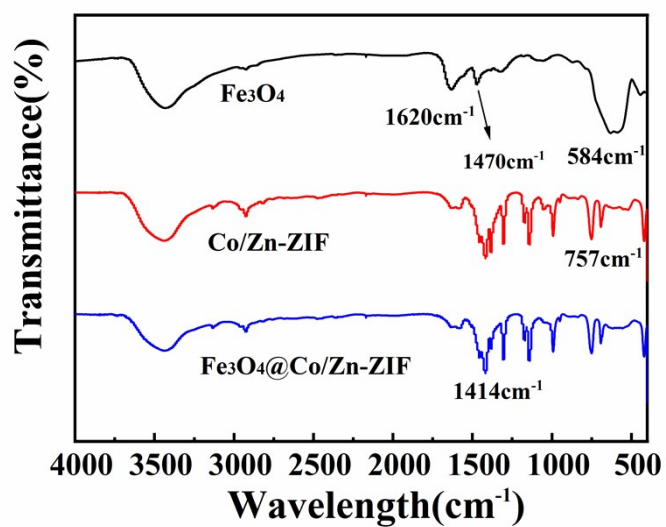

Fig.S3 FT-IR spectra of Fe<sub>3</sub>O<sub>4</sub>, Co/Zn-ZIF and Fe<sub>3</sub>O<sub>4</sub>@Co/Zn-ZIF

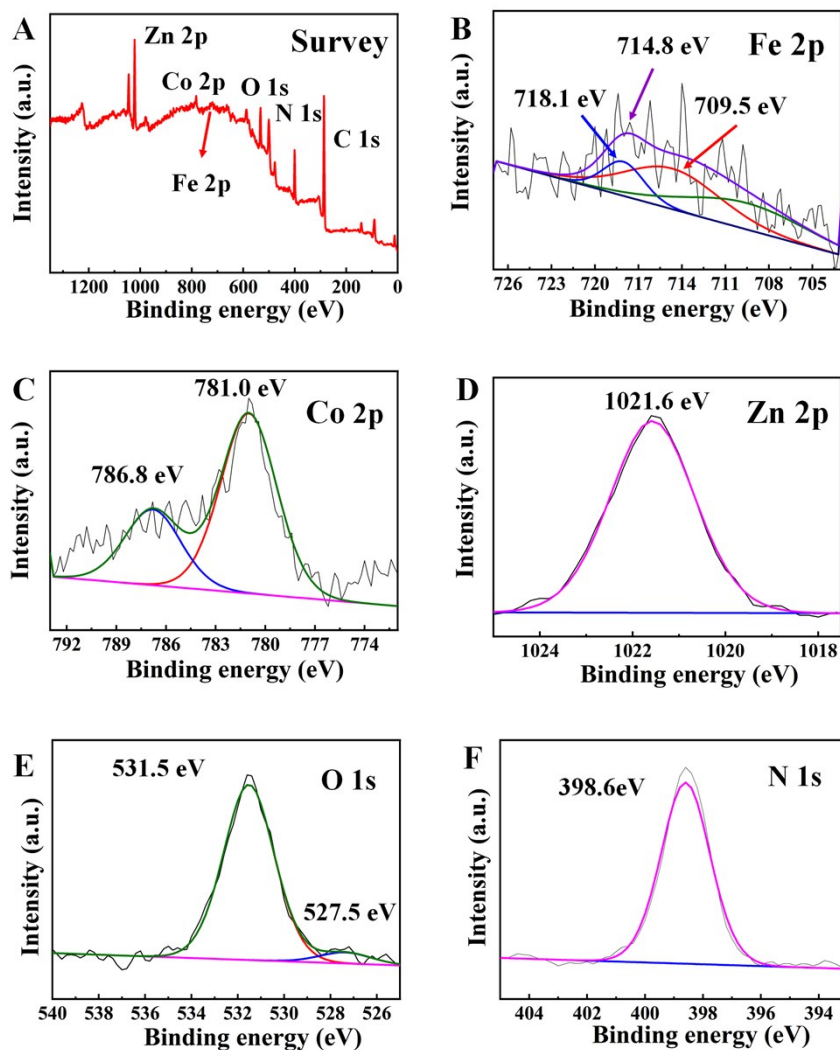

Fig.S4 XPS of  $\text{Fe}_3\text{O}_4@\text{Co/Zn-ZIF}$ : (A) survey XPS spectra; (B) Fe 2p<sub>3/2</sub>; (C) Co 2p<sub>3/2</sub>; (D) Zn 2p<sub>3/2</sub>; (E) O1s; (F) N1s

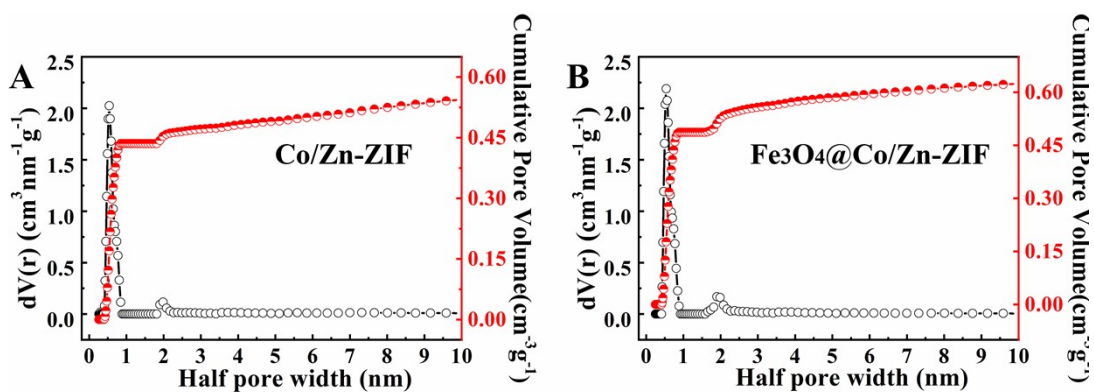

Fig.S5 DFT pore size distribution of Co/Zn-ZIF and  $\text{Fe}_3\text{O}_4@\text{Co/Zn-ZIF}$

Table S1 BET surface areas and DFT pore size distribution of Co/Zn-ZIF and

$\text{Fe}_3\text{O}_4@\text{Co/Zn-ZIF}$

| Catalysts                                | BET surface areas<br>( $\text{m}^2/\text{g}$ ) | Total pore volume<br>( $\text{cm}^3/\text{g}$ ) | Average pore size<br>(nm) |
|------------------------------------------|------------------------------------------------|-------------------------------------------------|---------------------------|
| Co/Zn-ZIF                                | 1588                                           | 0.747                                           | 1.04                      |
| $\text{Fe}_3\text{O}_4@\text{Co/Zn-ZIF}$ | 1397                                           | 0.705                                           | 1.49                      |

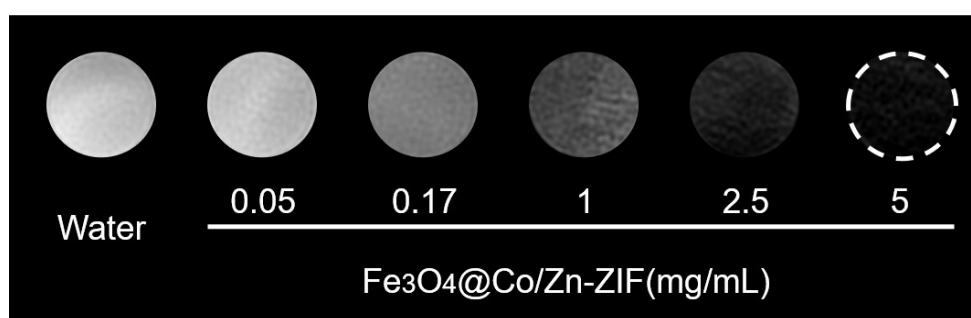

Fig.S6 In vitro  $T_2$ -weighted MR images of  $\text{Fe}_3\text{O}_4@\text{Co/Zn-ZIF}$  with different concentrations.
